# Supplementary material for: Fungal Biodiversity of the Most Common Types of Polish Soil in a Long-Term Microplot Experiment
Source: Front Microbiol. 2019 Jan 22;10:6. doi: 10.3389/fmicb.2019.00006 (PMC6357946; doi:10.3389/fmicb.2019.00006)
Supplement: TABLE S1 — Alpha diversity indexes calculated for each of eight soil fungal community. [file Table_1.XLSX]

## Sheet: poletka_richness
pH	Soil	Observed	ACE	Shannon	Simpson	InvSimpson	Fisher
4.0 - 4.7	Brunic Arenosol I	2115	2121.29	5.47162	0.979828	49.5737	336.48
	Brunic Arenosol II	2025	2058.67	5.50589	0.988389	86.1221	319.54
	Haplic_Cambisol	2374	2389.55	5.16391	0.949584	19.835	386.121
5.4 - 5.7	Haplic Luvisol	3392	3421.19	6.22813	0.991715	120.696	592.954
	Cambisol (Eutric)	4568	4583.85	6.64196	0.993335	150.036	852.396
7.3 - 7.5	Cambic Leptosol	4339	4339	6.7656	0.994887	195.578	800.287
	Gleyic Chernozem	2899	2914.42	5.02474	0.948855	19.5521	490.566
	Fluvic Cambisol	3848	3868.85	6.41032	0.991095	112.292	691.108
